# Supplementary material for: Selenite and tellurite form mixed seleno- and tellurotrisulfides with CstR from Staphylococcus aureus
Source: Royal Society of Chemistry journal article supplement (doi:10.1039/c3mt20205d), 2013-01-01
Supplement: c3mt20205d.pdf [file c3mt20205d.pdf]

**Fig. S1:** The full  $m/z$  ratios, 700-1800, of CstR (A-C) and CsoR (D-F). A and D are unreacted controls, B and E were reacted with  $\text{SeO}_3^{2-}$ , and C and F reacted with  $\text{TeO}_3^{2-}$  as described in the materials and methods. Unreacted CstR displays a  $m/z$  range from +6 to +13 and cross-linked CstR ranges from +11 to +20. Unreacted CsoR displays a  $m/z$  range from +7 to +15 and cross-linked CsoR from +13 to +23.

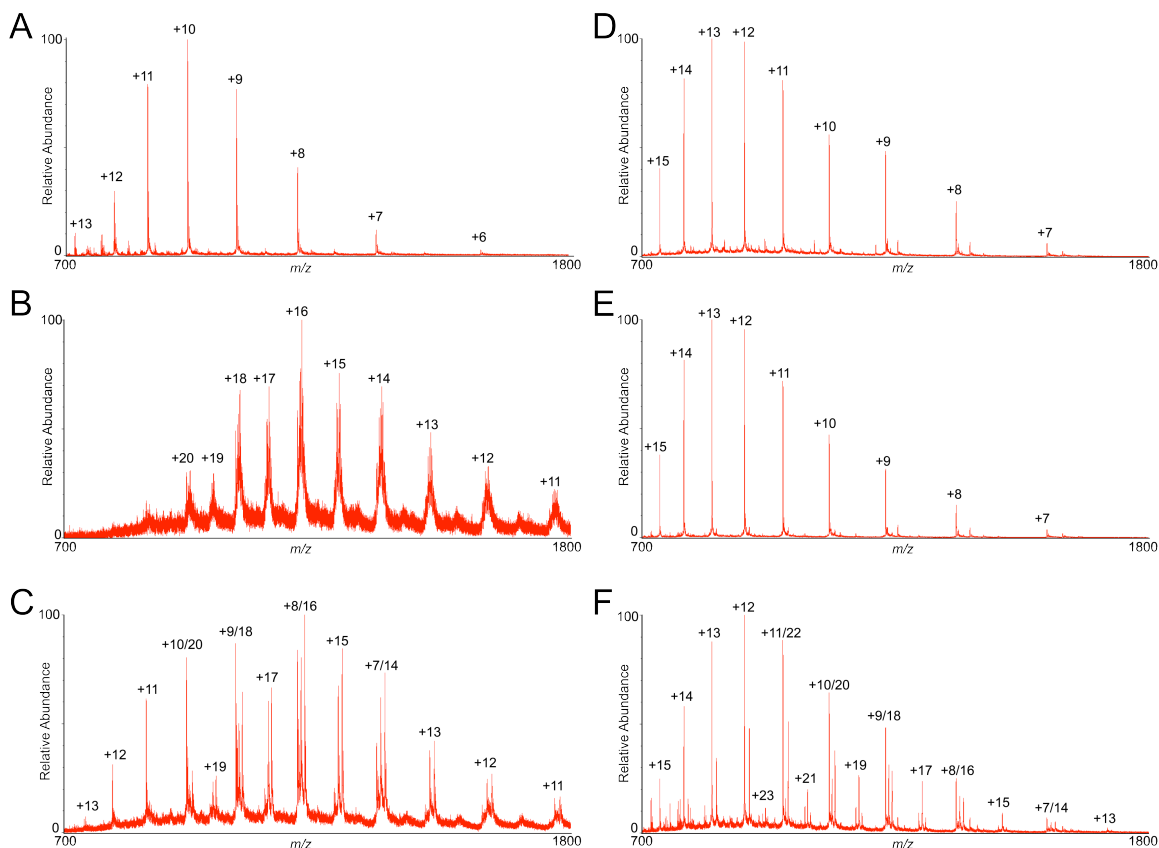

**Fig. S2:** Fragmentation patterns of the Cys31 (A), MMEEGKDCKDVITQISASK, and Cys60 (B), LMGIISENLIECVK, containing peptides from a tryptic digest of reduced CstR. Both peptides readily fragment as most ions are readily observed. These spectra were used to help identify cross-linked CstR peptides.

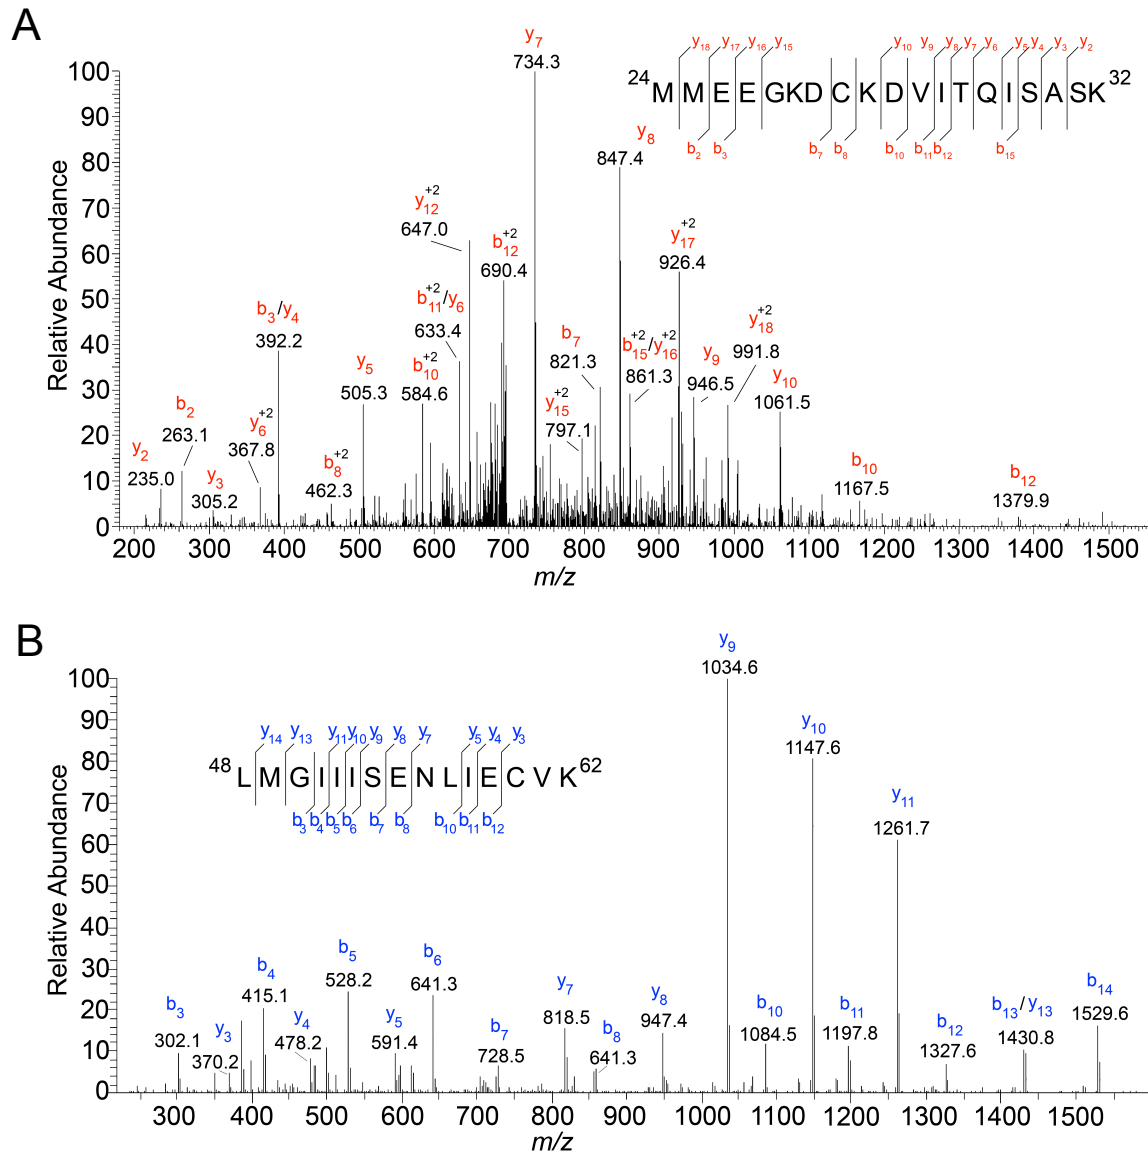

**Fig. S3:** CstR reacted with  $\text{SeO}_3^{2-}$  contains prominent disulfide peaks with oxidized cysteine residues. (A) Sum of +4 ions detected over the elution range of CstR cross-linked species. The labeled cross-linked peptides are; **1**, disulfide cross-linked CstR (fragmentation pattern in Fig. 2B, main text); **2**, disulfide cross-linked CstR with one oxidized methionine (fragmentation data not shown); **3**, disulfide cross-linked CstR with two oxygen atoms distributed between the cysteine residues (fragmentation shown in panel B); **4**, Same as **3** with an oxidized methionine (fragmentation data not shown); **5**, selenotrisulfide cross-linked CstR (fragmentation pattern in Fig. 3D, main text); **6**, selenotrisulfide cross-linked CstR with one oxidized methionine (fragmentation data not shown). (B) Fragmentation pattern of disulfide cross-linked CstR with two cysteine oxidations (peak **3** from panel A). Cross-linked  $\text{AB}_{\text{yn}}$  ions contain a mass shift of +32 Da and correspond to two total oxygen atom adductions on one or both cysteine  $\text{S}_\gamma$  atom. An oxidation of either Met residue on peptide “A” yields an  $\text{A}_{\text{b}7}$  ion with a mass of approximately 837 or 853 Da for one or two oxygen atoms, respectively. The observed  $\text{A}_{\text{b}7}$  ion has a mass consistent with the reduced state, 821 Da. Similarly, a Met residue oxidation on peptide “B” would yield  $\text{B}_{\text{bn}}$  ions with a mass shift of +16 or +32 Da, e.g., the observed  $\text{B}_{\text{b}3}$  ion would shift to approximately 318 or 334 Da with one or two oxygen atoms, respectively. As a result, we conclude that the oxygen adducts here (\*) are assignable as either a mixture of thiosulfonates or  $\alpha$ -disulfoxide (Fig. 4, main text).

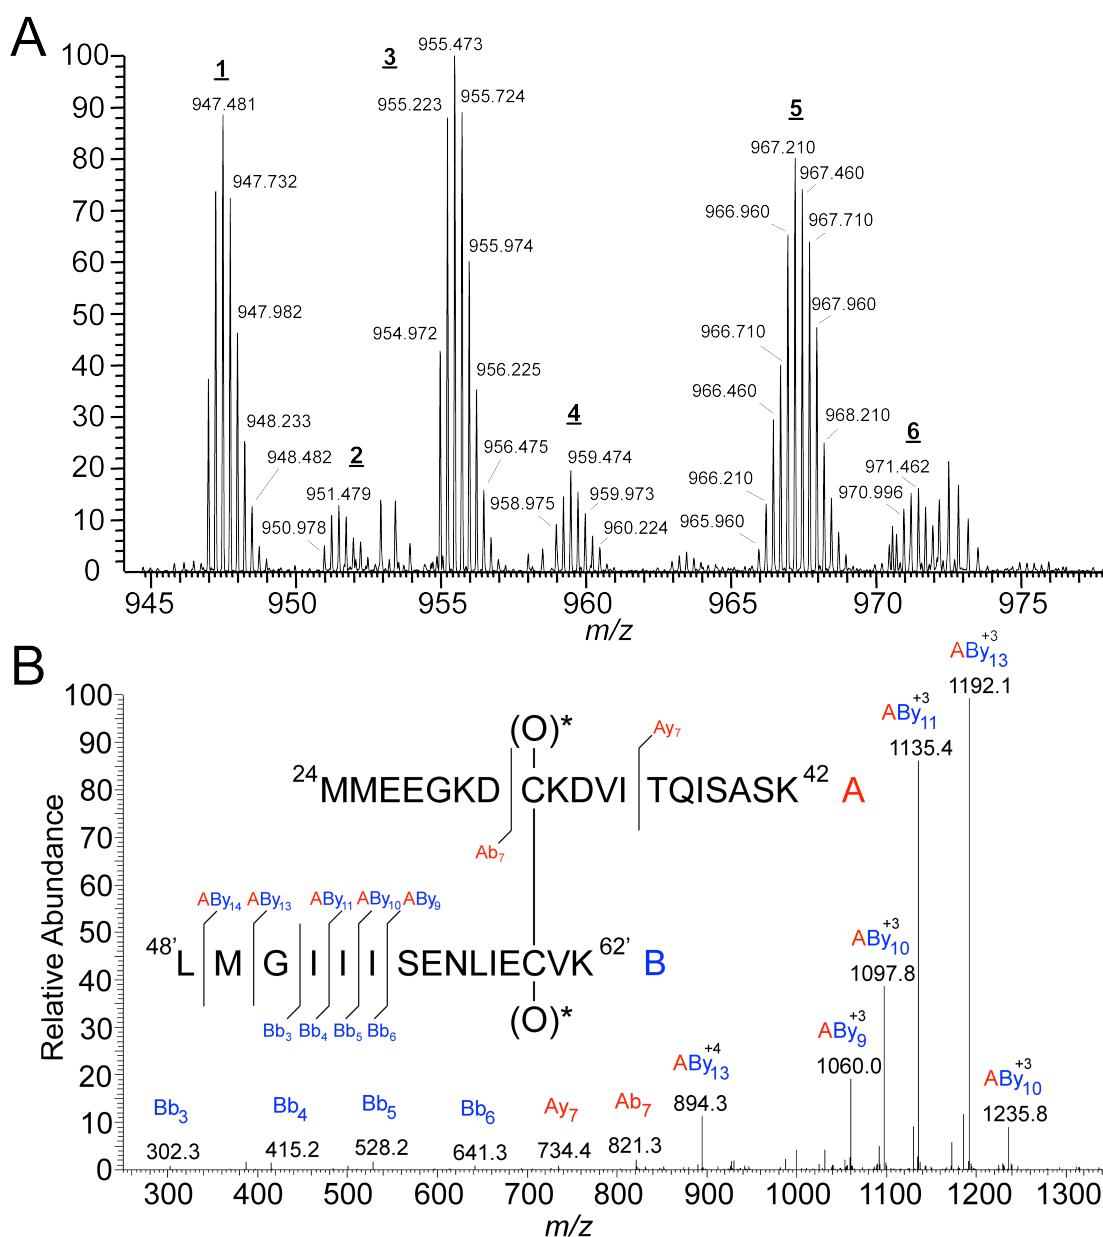

**Fig. S4:** Reaction products observed by ESI-MS from the reaction (17 h, RT) of C31A CstR (A and B) and C60A CstR (C and D) with tetrathionate (panels A and C) and  $\text{SeO}_3^{2-}$  (panels B and D). Deconvoluted masses from these spectra are shown in Table S4. Addition of tetrathionate to C31A CstR leads to the formation of disulfide cross-linked CstR as  $^{60}\text{CysS-SCys}^{60}$  likely across the tetramer interface (see Fig. 1, main text) ( $m/z$  of +12 to +24). The analogous reaction with C60A CstR forms nearly exclusively  $^{31}\text{CysS-S}_2\text{O}_3$  ( $m/z$  of +7 to +12). Reaction with selenite (panels B and D) leads to significant unreacted, reduced CstRs and a mixture of products dominated by the di- and selenotrisulfide cross-linked species, again likely linking cysteines on different dimers. In addition to these species, the reaction of C60A CstR with selenite (panel D) also yields a detectable amount of the monofunctionalized  $^{31}\text{CysS-SeO}_3^{2-}$  (filled circles) (Table S4). The small amount of this product is consistent with that of a reaction intermediate on pathways to cross-linked species, although this was not investigated here. (E) Fluorescence anisotropy titrations of reduced C31A (open circles\*) or C60A (open squares\*) CstR before and following full derivatization with selenite (closed symbols). Derivatization was complete after 48 h. \*Titrations shown are the same as those shown in Fig. 5, main text.

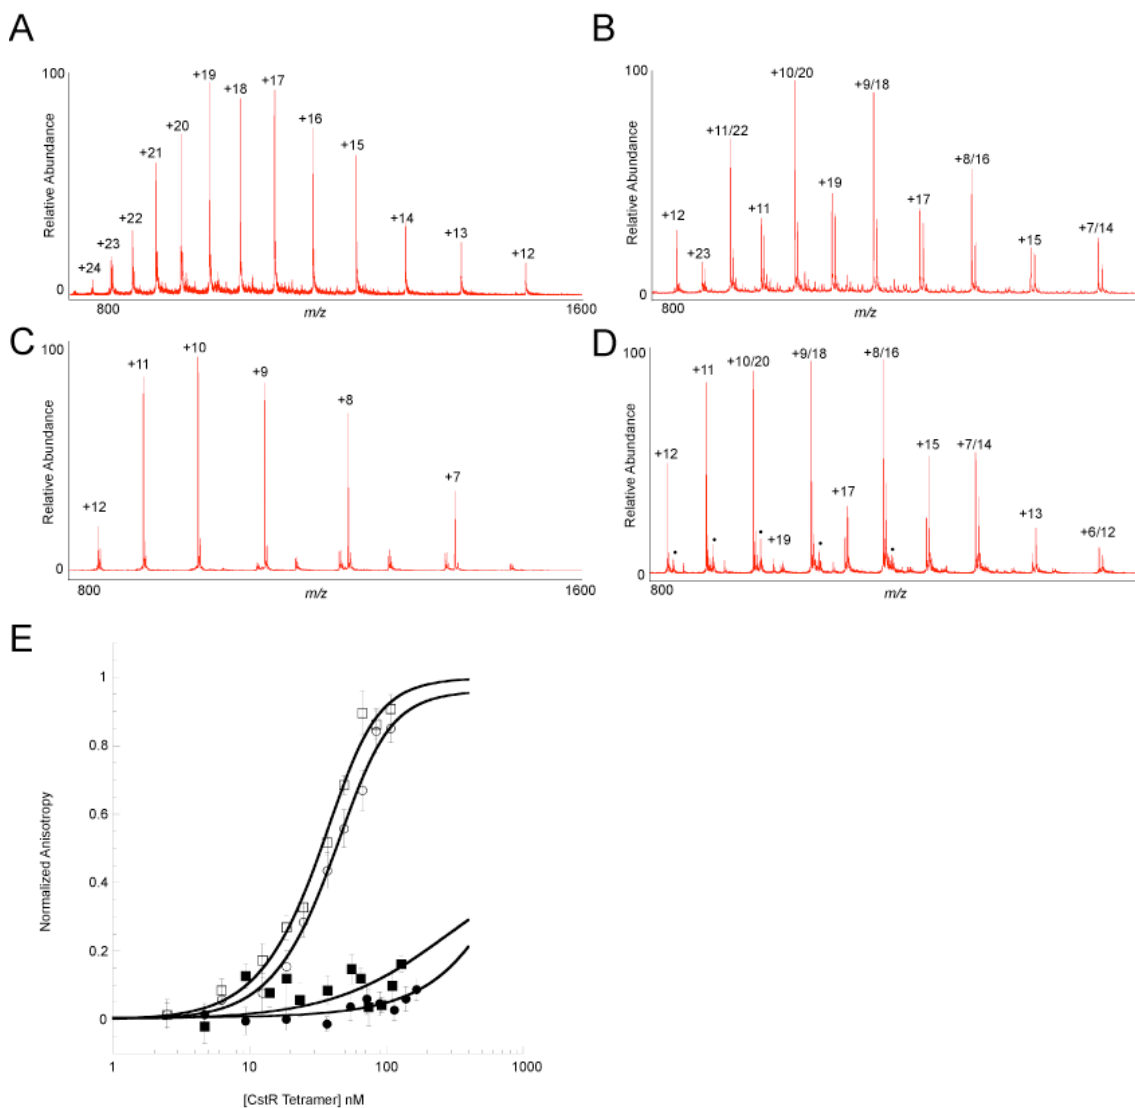

**Table S1:** CstR cysteine mutant Quikchange™ mutagenesis primers used in this study. Underlined characters are bases changed to introduce cysteine to alanine mutations. *cst* OP1 corresponds to the DNA used in fluorescence anisotropy experiments where ‘F’ denotes fluorescein.

| Primer          | Direction | Primer Sequence                               |
|-----------------|-----------|-----------------------------------------------|
| C31A CstR       | Forward   | GGAGGAAGGAAAAGAC <u>GCT</u> AAGATGTCATTAC     |
|                 | Reverse   | GTAATGACATCTTTAG <u>CGT</u> CTTTTCCTTCCTCC    |
| C60A CstR       | Forward   | GTGAGAATTTAATAGAA <u>GCT</u> GTAAGAGCAGCTGCGG |
|                 | Reverse   | CCGCAGCTGCTTTTACAGCTTCTATTAAATTCTCAC          |
| <i>cst</i> OP 1 | Forward   | ATGTGTCAAATACCCCTAGAGGTATTTG                  |
|                 | Reverse   | F-CAAATACCTCTAGGGGTATTTGACACAT                |

**Table S2:** Summary of deconvoluted CstR masses observed by LC-ESI-MS. All mass shifts are relative to CstR<sup>RS-H</sup> or CstR<sub>2</sub><sup>(RS-SR')</sup> as indicated by (-).

| Modifier                                    | M <sub>r</sub> Expected | M <sub>r</sub> Observed | Mass Shift | Assignment                                       |
|---------------------------------------------|-------------------------|-------------------------|------------|--------------------------------------------------|
| None                                        | 9641.2                  | 9641.3                  | -          | CstR <sup>RS-H</sup>                             |
|                                             | 9663.2                  | 6443.4                  | 22.1       | CstR <sup>RS-H</sup> + Na                        |
|                                             | 19280.4                 | 19282.3                 | -          | CstR <sub>2</sub> <sup>RS-SR'</sup>              |
| SeO <sub>3</sub> <sup>2-</sup>              | 9641.2                  | 9638.2                  | -          | CstR <sup>RS-H</sup>                             |
|                                             | 9663.2                  | 9660.4                  | 22.2       | CstR <sup>RS-H</sup> + Na                        |
|                                             | 19280.4                 | 19277.5                 | -          | CstR <sub>2</sub> <sup>RS-SR'</sup>              |
|                                             | 19312.4                 | 19309.7                 | 32.2       | CstR <sub>2</sub> <sup>RS-SR'</sup> + 2 O        |
|                                             | 19359.4                 | 19357.4                 | 79.9       | CstR <sub>2</sub> <sup>RS-Se-SR'</sup>           |
|                                             | 19391.4                 | 19389.6                 | 112.1      | CstR <sub>2</sub> <sup>RS-Se-SR'</sup> + 2 O     |
|                                             | 19425.4                 | 19422.5                 | 145        | CstR <sub>2</sub> <sup>RS-Se-SR'</sup> + 3 Na    |
|                                             | 19438.3                 | 19437.1                 | 159.6      | CstR <sub>2</sub> <sup>(RS-Se-SR')2</sup>        |
|                                             | 19470.3                 | 19468.8                 | 191.3      | CstR <sub>2</sub> <sup>(RS-Se-SR')2</sup> + 2 O  |
|                                             | 19503.4                 | 19500.3                 | 222.8      | CstR <sub>2</sub> <sup>(RS-Se-SR')2</sup> + 3 Na |
| TeO <sub>3</sub> <sup>2-</sup>              | 9641.2                  | 9640.2                  | -          | CstR <sup>RS-H</sup>                             |
|                                             | 9657.2                  | 9656.2                  | 16         | CstR <sup>RS-H</sup> + O                         |
|                                             | 9673.2                  | 9671.6                  | 31.4       | CstR <sup>RS-H</sup> + 2 O                       |
|                                             | 9768.8                  | 9767.5                  | 127.3      | CstR <sup>RS-H</sup> + Te                        |
|                                             | 19280.4                 | 19279.7                 | -          | CstR <sub>2</sub> <sup>RS-SR'</sup>              |
|                                             | 19312.4                 | 19311.4                 | 31.7       | CstR <sub>2</sub> <sup>RS-SR'</sup> + 2 O        |
|                                             | 19408                   | 19407.3                 | 127.6      | CstR <sub>2</sub> <sup>RS-Te-SR'</sup>           |
|                                             | 19440                   | 19439.1                 | 159.4      | CstR <sub>2</sub> <sup>RS-Te-SR'</sup> + 2 O     |
|                                             | 19535.6                 | 19534.6                 | 254.9      | CstR <sub>2</sub> <sup>(RS-Te-SR')2</sup>        |
|                                             | 19567.6                 | 19567.6                 | 287.9      | CstR <sub>2</sub> <sup>(RS-Te-SR')2</sup> + 2 O  |
| S <sub>4</sub> O <sub>6</sub> <sup>2-</sup> | 9641.2                  | -                       | -          | CstR <sup>RS-H</sup>                             |
|                                             | 19280.4                 | 19279.4                 | -          | CstR <sub>2</sub> <sup>RS-SR'</sup>              |
|                                             | 19302.4                 | 19300.6                 | 21.2       | CstR <sub>2</sub> <sup>RS-SR'</sup> + Na         |
|                                             | 19312.4                 | 19311.6                 | 32.2       | CstR <sub>2</sub> <sup>RS-S-SR'</sup>            |
|                                             | 19324.4                 | 19322.4                 | 43         | CstR <sub>2</sub> <sup>RS-SR'</sup> + 2 Na       |

**Table S3:** Summary of deconvoluted CsoR masses observed by LC-ESI-MS. All mass shifts are relative to CsoR<sup>RS-H</sup> or CsoR<sub>2</sub><sup>(RS-SR')</sup> as indicated by (-).

| Modifier                       | M <sub>r</sub> Expected | M <sub>r</sub> Observed | Mass Shift | Assignment                                |
|--------------------------------|-------------------------|-------------------------|------------|-------------------------------------------|
| None                           | 11036.6                 | 11034.9                 | -          | CsoR <sup>RS-H</sup>                      |
|                                | 11058.6                 | 11057.0                 | 22.1       | CsoR <sup>RS-H</sup> + Na                 |
| SeO <sub>3</sub> <sup>2-</sup> | 11036.6                 | 11035.4                 | -          | CsoR <sup>RS-H</sup>                      |
|                                | 11058.6                 | 11057.5                 | 22.1       | CsoR <sup>RS-H</sup> + Na                 |
| TeO <sub>3</sub> <sup>2-</sup> | 11036.6                 | 11033.2                 | -          | CsoR <sup>RS-H</sup>                      |
|                                | 21069.2                 | 22065.4                 | -          | CsoR <sup>RS-SR'</sup>                    |
|                                | 21196.8                 | 22192.2                 | 126.8      | CsoR <sub>2</sub> <sup>RS-Te-SR'</sup>    |
|                                | 21324.4                 | 22318.1                 | 252.7      | CsoR <sub>2</sub> <sup>(RS-Te-SR')2</sup> |

**Table S4:** Summary of deconvoluted CstR cysteine mutant masses observed by LC-ESI-MS. All mass shifts are relative to CstR<sup>RS-H</sup> or CstR<sub>2</sub><sup>RS-SR'</sup> as indicated by (-).\*

| Protein                                     | Modifier                                    | M <sub>r</sub> Expected        | M <sub>r</sub> Observed       | Mass Shift                                   | Assignment                                   |                           |                         |
|---------------------------------------------|---------------------------------------------|--------------------------------|-------------------------------|----------------------------------------------|----------------------------------------------|---------------------------|-------------------------|
| C31A                                        | None                                        | 9609.1                         | 9607.2                        | -                                            | CstR <sup>RS-H</sup>                         |                           |                         |
|                                             | MMTS                                        | 9656.2                         | 9653.3                        | 46.1                                         | CstR <sup>RS-SCH3</sup>                      |                           |                         |
|                                             | SO <sub>3</sub> <sup>2-</sup>               | 9609.1                         | 9606.5                        | -                                            | CstR <sup>RS-H</sup>                         |                           |                         |
|                                             |                                             | 9631.1                         | 9627.9                        | 21.4                                         | CstR <sup>RS-H</sup> + Na                    |                           |                         |
|                                             |                                             | 9653.1                         | 9648.6                        | 42.1                                         | CstR <sup>RS-H</sup> + 2 Na                  |                           |                         |
|                                             |                                             | SeO <sub>3</sub> <sup>2-</sup> | 9609.1                        | 9606.0                                       | -                                            | CstR <sup>RS-H</sup>      |                         |
|                                             |                                             | 9625.1                         | 9622.3                        | 16.3                                         | CstR <sup>RS-H</sup> + O                     |                           |                         |
|                                             |                                             | 19216.2                        | 19211.6                       | -                                            | CstR <sub>2</sub> <sup>RS-SR'</sup>          |                           |                         |
|                                             |                                             | 19295.2                        | 19290.2                       | 78.6                                         | CstR <sub>2</sub> <sup>RS-Se-SR'</sup>       |                           |                         |
|                                             |                                             | 19327.2                        | 19326.4                       | 114.8                                        | CstR <sub>2</sub> <sup>RS-Se-SR'</sup> + 2 O |                           |                         |
|                                             | S <sub>4</sub> O <sub>6</sub> <sup>2-</sup> | 9609.1                         | 9606.2                        | -                                            | CstR <sup>RS-H</sup>                         |                           |                         |
|                                             |                                             | 19216.2                        | 19211.5                       | -                                            | CstR <sub>2</sub> <sup>RS-SR'</sup>          |                           |                         |
|                                             |                                             | 19232.2                        | 19227.5                       | 16.0                                         | CstR <sub>2</sub> <sup>RS-SR'</sup> + O      |                           |                         |
|                                             |                                             | 19238.2                        | 19232.6                       | 21.1                                         | CstR <sub>2</sub> <sup>RS-SR'</sup> + 2 Na   |                           |                         |
|                                             |                                             | 19260.2                        | 19254.8                       | 43.3                                         | CstR <sub>2</sub> <sup>RS-SR'</sup> + 2 Na   |                           |                         |
|                                             |                                             | C60A                           | None                          | 9609.1                                       | 9607.0                                       | -                         | CstR <sup>RS-H</sup>    |
|                                             |                                             |                                | MMTS                          | 9656.2                                       | 9653.5                                       | 46.5                      | CstR <sup>RS-SCH3</sup> |
|                                             |                                             |                                | SO <sub>3</sub> <sup>2-</sup> | 9609.1                                       | 9607.3                                       | -                         | CstR <sup>RS-H</sup>    |
|                                             | 9631.1                                      |                                |                               | 9628.3                                       | 21.0                                         | CstR <sup>RS-H</sup> + Na |                         |
|                                             | 9689.2                                      |                                |                               | 9687.4                                       | 80.1                                         | CstR <sup>RS-SO3</sup>    |                         |
| 9711.2                                      | 9708.3                                      |                                |                               | 101.0                                        | CstR <sup>RS-SO3</sup> + Na                  |                           |                         |
| SeO <sub>3</sub> <sup>2-</sup>              | 9609.1                                      |                                | 9606                          | -                                            | CstR <sup>RS-H</sup>                         |                           |                         |
|                                             | 9625.1                                      |                                | 9622.5                        | 16.5                                         | CstR <sup>RS-H</sup> + O                     |                           |                         |
|                                             | 9641.1                                      |                                | 9638.3                        | 32.3                                         | CstR <sup>RS-H</sup> + 2O                    |                           |                         |
|                                             | 9688.1                                      |                                | 9684.5                        | 78.5                                         | CstR <sup>RS-H</sup> + Se                    |                           |                         |
|                                             | 9720.1                                      | 9717.7                         | 111.7                         | CstR <sup>RS-SeO2</sup>                      |                                              |                           |                         |
|                                             | 9736.1                                      | 9738.8                         | 132.8                         | CstR <sup>RS-SeO3</sup>                      |                                              |                           |                         |
|                                             | 19216.2                                     | 19211.6                        | -                             | CstR <sub>2</sub> <sup>RS-SR'</sup>          |                                              |                           |                         |
|                                             | 19248.2                                     | 19245.4                        | 33.8                          | CstR <sub>2</sub> <sup>RS-SR'</sup> + 2 O    |                                              |                           |                         |
|                                             | 19295.2                                     | 19290.3                        | 78.7                          | CstR <sub>2</sub> <sup>RS-Se-SR'</sup>       |                                              |                           |                         |
|                                             | 19327.2                                     | 19323.3                        | 111.7                         | CstR <sub>2</sub> <sup>RS-Se-SR'</sup> + 2 O |                                              |                           |                         |
| S <sub>4</sub> O <sub>6</sub> <sup>2-</sup> | 9609.1                                      | -                              | -                             | CstR <sup>RS-H</sup>                         |                                              |                           |                         |
|                                             | 9721.1                                      | 9718.1                         | 112.1                         | CstR <sup>RS-S2O3</sup>                      |                                              |                           |                         |
|                                             | 9753.1                                      | 9750.7                         | 144.7                         | CstR <sup>RS-S3O3</sup>                      |                                              |                           |                         |
|                                             | C31/60A                                     | None                           | 9577.0                        | 9575.3                                       | -                                            | No Thiol                  |                         |

\*Major species observable by ESI-MS deconvoluted from the data shown in Fig. S4 are highlighted in red. The expected RS-SeO<sub>3</sub><sup>2-</sup> adduct on Cys31 in C60A CstR is highlighted in bold font.
